# Supplementary material for: A re-annotation pipeline for Illumina BeadArrays: improving the interpretation of gene expression data
Source: PubMed Central journal article supplement — Nucleic Acids Res. 2009 Nov 18;38(3):e17. doi: 10.1093/nar/gkp942 (PMC2817484; doi:10.1093/nar/gkp942), 2009-11-18
Supplement: gkp942_2.pdf [file gkp942_2.pdf]

A

# ReMOAT

CONVERT GENE ID'S

Paste gene ID's in box

ILMN\_1705423  
ILMN\_1697642  
ILMN\_1788184  
ILMN\_1681845  
ILMN\_1889845  
ILMN\_1690979  
ILMN\_1811114  
ILMN\_1660729  
ILMN\_1705659  
ILMN\_1694630  
ILMN\_1819355  
ILMN\_1797055  
ILMN\_1713038  
ILMN\_1670547  
ILMN\_2342515  
ILMN\_1809425  
ILMN\_1728019  
ILMN\_1783852  
ILMN\_1882325  
ILMN\_1721344  
ILMN\_1691223  
ILMN\_1766219  
ILMN\_1679973

Select ID type:  
Illumina

Species:  
Human

Platform:  
Illumina\_Human\_WG-6\_V1\_hg18

Please choose output ID type:  
 Illumina  
 Ensembl  
 Entrez  
 Gene Symbol  
 Unigene  
 Lumi  
 CytoBand

Home

Convert Gene ID's

Search Probe Sequences

Probe Location

Second Matches

Transcript Information

Contact

Disclaimer

How to cite

Help

UNIVERSITY OF CAMBRIDGE

B

## ID Converter

| Illumina probe | Lumi id            | Gene Symbol | Ensembl         | Entrez | Unigene   | Cyto Band | Description                                                                                             | iHOP | Wiki Genes |
|----------------|--------------------|-------------|-----------------|--------|-----------|-----------|---------------------------------------------------------------------------------------------------------|------|------------|
| ILMN_1705423   | Ed5J5UnfUnjp1E36qA | TBC1D29     | ENSG00000197689 | 651450 | Hs.241421 | 17q11.2   | TBC1 domain family, member 29                                                                           | iHop | wikigenes  |
| ILMN_1697642   | BU_IInUkheOXOBERI  | BCAP29      | ENSG00000057590 | 55973  | Hs.303787 | 7q22.3    | B-cell receptor-associated protein 29                                                                   | iHop | wikigenes  |
| ILMN_1788184   | 3Sm5Uom7k7HlP61NM  | CIDEA       | ENSG00000176194 | 1149   | Hs.249129 | 18p11.21  | Cell death-inducing DFPA-like effector a                                                                | iHop | wikigenes  |
| ILMN_1681845   | Ql8LF5 HR6JleKf6u4 | PAPD4       | ENSG00000164329 | 167153 | Hs.418198 | 5q14.1    | PAP associated domain containing 4                                                                      | iHop | wikigenes  |
| ILMN_1889845   | uiT4gnlKel.dcOwf4o |             |                 |        | Hs.542469 | 20p12.2   |                                                                                                         | iHop | wikigenes  |
| ILMN_1690979   | rqJNCKP9ITJF7T7FR4 | SLC17A3     | ENSG00000124564 | 10786  | Hs.327179 | 6p22.2    | Solute carrier family 17 (sodium phosphate), member 3                                                   | iHop | wikigenes  |
| ILMN_1811114   | E_KBTdJTXVKCVFXhXw | SDS         | ENSG00000135094 | 10993  | Hs.654416 | 12q24.13  | Serine dehydratase                                                                                      | iHop | wikigenes  |
| ILMN_1660729   | uFKnit46gofh1K5ljk | ATP6V1C2    | ENSG00000143882 | 245973 | Hs.580464 | 2p25.1    | ATPase, H+ transporting, lysosomal 42kDa, V1 subunit C2                                                 | iHop | wikigenes  |
| ILMN_1705659   | HilE5uDqOglIq3eXj4 | FAM71C      | ENSG00000180219 | 196472 | Hs.591011 | 12q23.1   | Family with sequence similarity 71, member C                                                            | iHop | wikigenes  |
| ILMN_1694630   | BX11LxXl d3DNTepCo | AKO55082    |                 | 645113 | Hs.680609 | 22q12.3   |                                                                                                         | iHop | wikigenes  |
| ILMN_1819355   | W3UuLHVT8SS7VQ95Do |             |                 |        | Hs.558279 | 8q24.12   |                                                                                                         | iHop | wikigenes  |
| ILMN_1797055   | Hqi3RRpw.jogr2KXEg | LIN52       | ENSG00000205659 | 91750  | Hs.612866 | 14q24.3   | Lin-52 homolog (C. elegans)                                                                             | iHop | wikigenes  |
| ILMN_1713038   | W5KEOeUil610idGwk0 | PCOTH       | ENSG00000205861 | 387911 | Hs.707257 | 13q12.12  | Prostate collagen triple helix                                                                          | iHop | wikigenes  |
| ILMN_1670547   | rVzFCKlgHFRfs73JE  | GRM1        | ENSG00000152822 | 2911   | Hs.32945  | 6q24.3    | Glutamate receptor, metabotropic 1                                                                      | iHop | wikigenes  |
| ILMN_1800425   | c12ITelNdd1OQue.qQ | SLC9A1      | ENSG00000090020 | 6548   | Hs.469116 | 1p36.11   | Solute carrier family 9 (sodium/hydrogen exchanger), member 1 (antiporter, Na+/H+, amiloride sensitive) | iHop | wikigenes  |
| ILMN_1728019   | uBujoq7tKivqEikiCI | PML         |                 | 5371   | Hs.526464 | 15q24.1   | Promyelocytic leukemia                                                                                  | iHop | wikigenes  |
| ILMN_1783852   | Tvl.5C3EDid_QSB0SU | CD164       | ENSG00000135535 | 8763   | Hs.520313 | 6q21      | CD164 molecule, sialomucin                                                                              | iHop | wikigenes  |
| ILMN_1882325   | 3V1oo7pChEIRKHYHeY |             |                 |        | Hs.576630 | 10q23.1   |                                                                                                         | iHop | wikigenes  |
| ILMN_1721344   | K0dTUXaUV1VJSMaDA  | MOBK12A     | ENSG00000172081 | 126308 | Hs.86912  | 19p13.3   | MOB1, Mps One Binder kinase activator-like 2A (yeast)                                                   | iHop | wikigenes  |
| ILMN_1691223   | NKQOxX_FM1QKMLNLO  | ZNF566      | ENSG00000186017 | 84924  | Hs.646371 | 19q13.12  | Zinc finger protein 566                                                                                 | iHop | wikigenes  |
| ILMN_1766219   | BX3oJ0PNGJE66AG6lo | HGC6.1.1    | ENSG00000153298 | 26236  | Hs.225962 | 6q27      | Homo sapiens HGC6.1.1 mRNA, complete cds.                                                               | iHop | wikigenes  |
| ILMN_1679973   | ivRLKrrrTxXIPTuzXo | OR1J2       | ENSG00000197233 | 26740  | Hs.460145 | 9q33.2    | Olfactory receptor, family 1, subfamily J, member 2                                                     | iHop | wikigenes  |

[Click Here To Download Table As A Tab Delimited Text File](#)

C

## Probe Reannotation

| Illumina probe | Probe Sequence                                     | Probe Type | Repeats | CpG Islands | GC%   | SNP's | quality score | quality comments                                                                        |
|----------------|----------------------------------------------------|------------|---------|-------------|-------|-------|---------------|-----------------------------------------------------------------------------------------|
| ILMN_1705423   | CTCTGCAGCTGCCAGCTCTCCAGCTGATGGCTCCACATCTTGGGGAA    | RefSeq_S   |         |             | 60.00 | 0     | Perfect       |                                                                                         |
| ILMN_1697642   | CCATTGAGAAGAGCTCCACCAGCAGACTGATGCCTATGAACACACACAG  | RefSeq_A   |         |             | 52.00 | 0     | Perfect       |                                                                                         |
| ILMN_1788184   | CAGCGGTGCCAGGAGCGGTGTCATGTGTGACAGCCATTTGGTCCATCAT  | RefSeq_A   |         |             | 58.00 | 0     | Perfect       |                                                                                         |
| ILMN_1681845   | GCCTTAAGTCTTTGCTTGACTCACTGGGATAGACTGAGCGTTTGGGTGTG | RefSeq_S   |         |             | 50.00 | 0     | Perfect       |                                                                                         |
| ILMN_1889845   | GAGCATTGAGAAGCTGCCAGGTGCCCTTCTCCTAATGTAACCTTTGAGG  | Unigene_S  |         |             | 50.00 | 0     | Perfect***    | *** Check this probe manually, no CDS annotation                                        |
| ILMN_1690979   | GGGAGCATCAAGAGGATTTTCGAGCATAGCACCTGTCAATGTACCCACTG | RefSeq_S   |         |             | 50.00 | 0     | Perfect       |                                                                                         |
| ILMN_1811114   | TTGAGGAACCATCTCAGCCATCTCCAGGAAGCCACCCCTGACCCCTTA   | RefSeq_S   |         |             | 58.00 | 0     | Perfect       |                                                                                         |
| ILMN_1660729   | ACCAGGGCTGAGGTCTGATGGGAAGACTTGACTCCAGGTGCAGAGATGC  | RefSeq_S   |         |             | 58.00 | 0     | Perfect       | * Transcript match to reverse strand                                                    |
| ILMN_1705659   | GAGGCCACATCGGTGAATGGATGGAAGCCAGAGGGTCTCTACTAGCTG   | RefSeq_S   |         |             | 58.00 | 0     | Perfect       |                                                                                         |
| ILMN_1694630   | CCTTCTCCAGTACCCCTTACTCCCTCTCTAATATCCATCTGGGCAAGGG  | RefSeq_S   |         |             | 52.00 | 0     | Perfect***    | *** Check this probe manually, no CDS annotation                                        |
| ILMN_1819355   | TCTCCAGTGAGTACTCCCATTTACAGCAGGTGCCCAATTTGCAATGG    | Unigene_S  |         |             | 50.00 | 0     | Perfect***    | *** Check this probe manually, no CDS annotation                                        |
| ILMN_1797055   | GGGAGTCTCACCACGGCTAATTTGATGGAGAAGGTTTCGAGGCCTACAGA | RefSeq_S   |         |             | 54.00 | 0     | Perfect       |                                                                                         |
| ILMN_1713038   | TGCAGGACAATGCTGCAGAGGCCTGGTCTCAGAGCTCACGTAAGCATC   | RefSeq_S   |         |             | 58.00 | 1     | Perfect       | * Transcript match to reverse strand                                                    |
| ILMN_1670547   | CCCTATACCAAGAGGGCCGAAACTTTCACCTTGATGTATGTTCTGATAC  | RefSeq_S   |         |             | 46.00 | 1     | Perfect       |                                                                                         |
| ILMN_1800425   | TCCTCGCCCATCTGTCCATCTCTCTCCATGCAAGTGTGTTGGGCA      | RefSeq_S   |         |             | 58.00 | 0     | Perfect       | * Transcript match to reverse strand                                                    |
| ILMN_1728019   | AACGTGGATGGAGGGTGTGTGAGGGAGGTTGGGACAGAGGCAGAGAAGG  | RefSeq_S   |         |             | 58.00 | 0     | Perfect       | * Transcript match to reverse strand                                                    |
| ILMN_1783852   | GTTAGATTTGCAAGTCTACAAATGAGCTCTTGCAACAGAACTGCACAGC  | RefSeq_S   |         |             | 42.00 | 0     | Perfect       |                                                                                         |
| ILMN_1882325   | CCCAGAGGAGGATGGCAAGGACACAGACAGACTCGAACTCTGCG       | Unigene_S  |         |             | 58.00 | 0     | Perfect***    | * Transcript match to reverse strand   *** Check this probe manually, no CDS annotation |
| ILMN_1721344   | TCACTCATCCACCTCGGAGACACCTCCCCAGCAGATACGGAATAA      | RefSeq_S   |         |             | 58.00 | 1     | Perfect       |                                                                                         |
| ILMN_1691223   | AGGCAAATGTACCCCTTGACCATATCCCAAAGGATAGTCTTATCAGTTC  | RefSeq_S   |         |             | 40.00 | 0     | Perfect       |                                                                                         |
| ILMN_1766219   | CCTTCTGGAGGCTCAATATACGAGCACATGGTGGAAAACGTTGGCCGG   | RefSeq_S   |         |             | 54.00 | 0     | Perfect       |                                                                                         |
| ILMN_1679973   | GTTCACAGTAGGGGTGGTGCATTACCTGCCATTCATGTATCTCTGG     | RefSeq_S   |         |             | 52.00 | 0     | Perfect       |                                                                                         |

[Click Here To Download Table as a Tab Delimited Text File](#)

Figure S1
