# Supplementary material for: A re-annotation pipeline for Illumina BeadArrays: improving the interpretation of gene expression data
Source: PubMed Central journal article supplement — Nucleic Acids Res. 2009 Nov 18;38(3):e17. doi: 10.1093/nar/gkp942 (PMC2817484; doi:10.1093/nar/gkp942), 2009-11-18
Supplement: gkp942_4.pdf [file gkp942_4.pdf]

Human WG-6 V1

Human WG-6 V2

Human WG-6 V3

Illumina  
original  
annotation

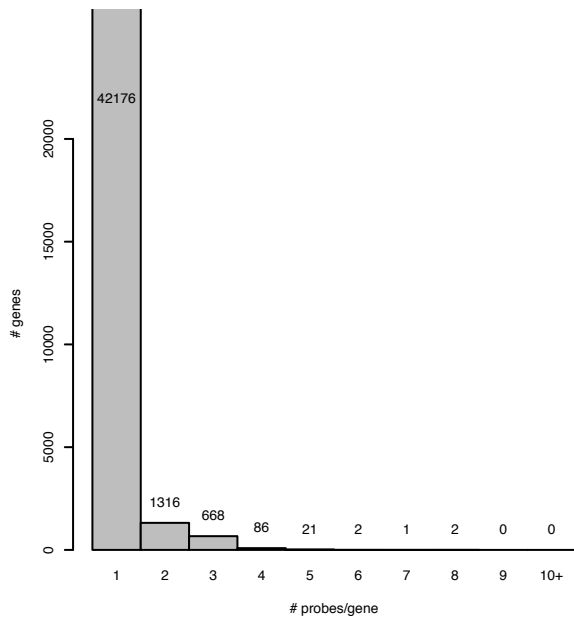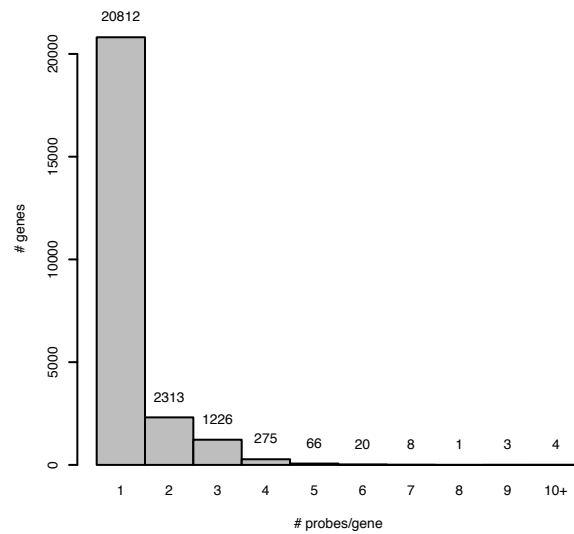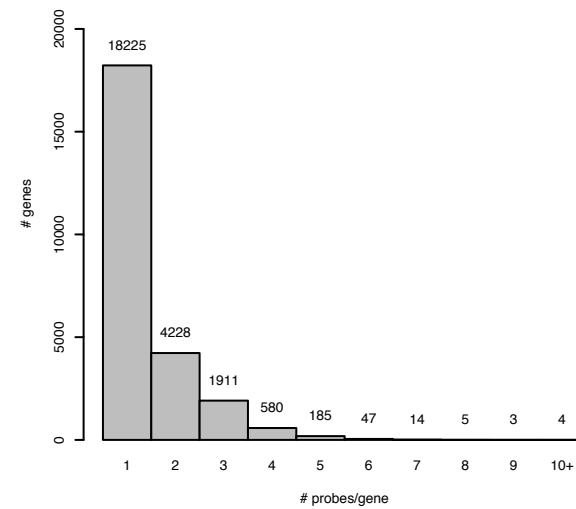

Re-annotation

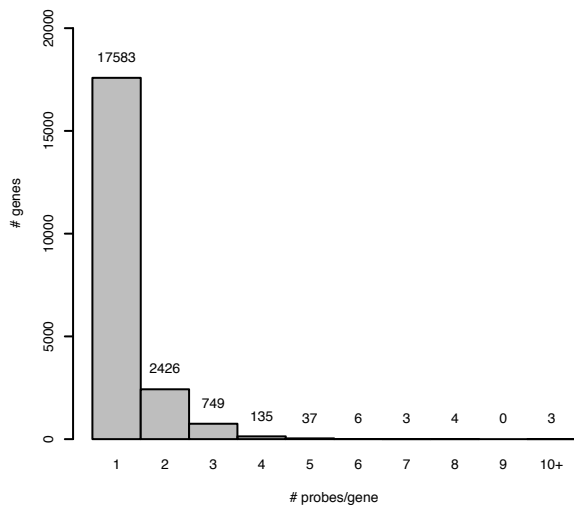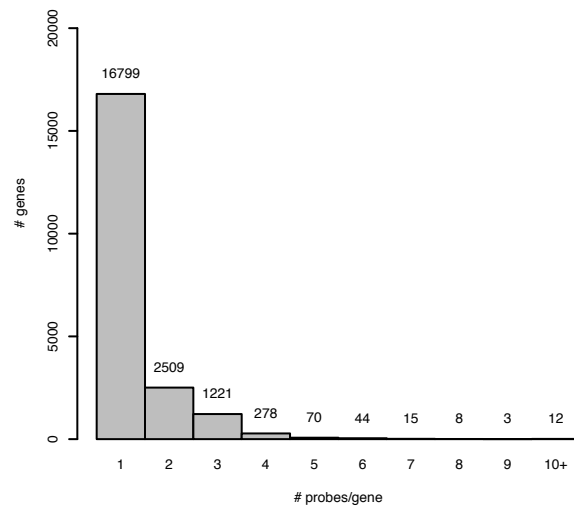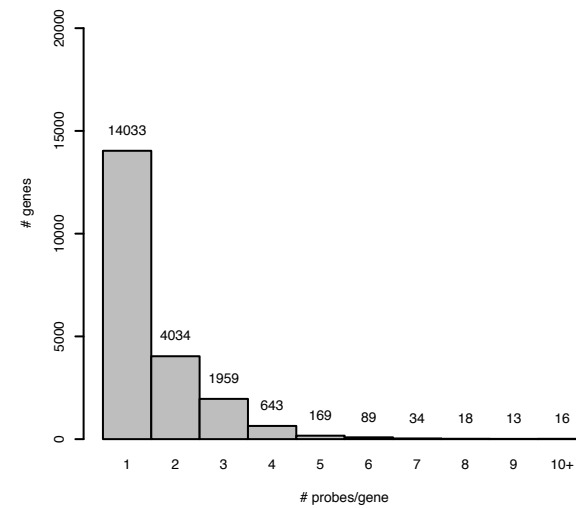

Figure S7

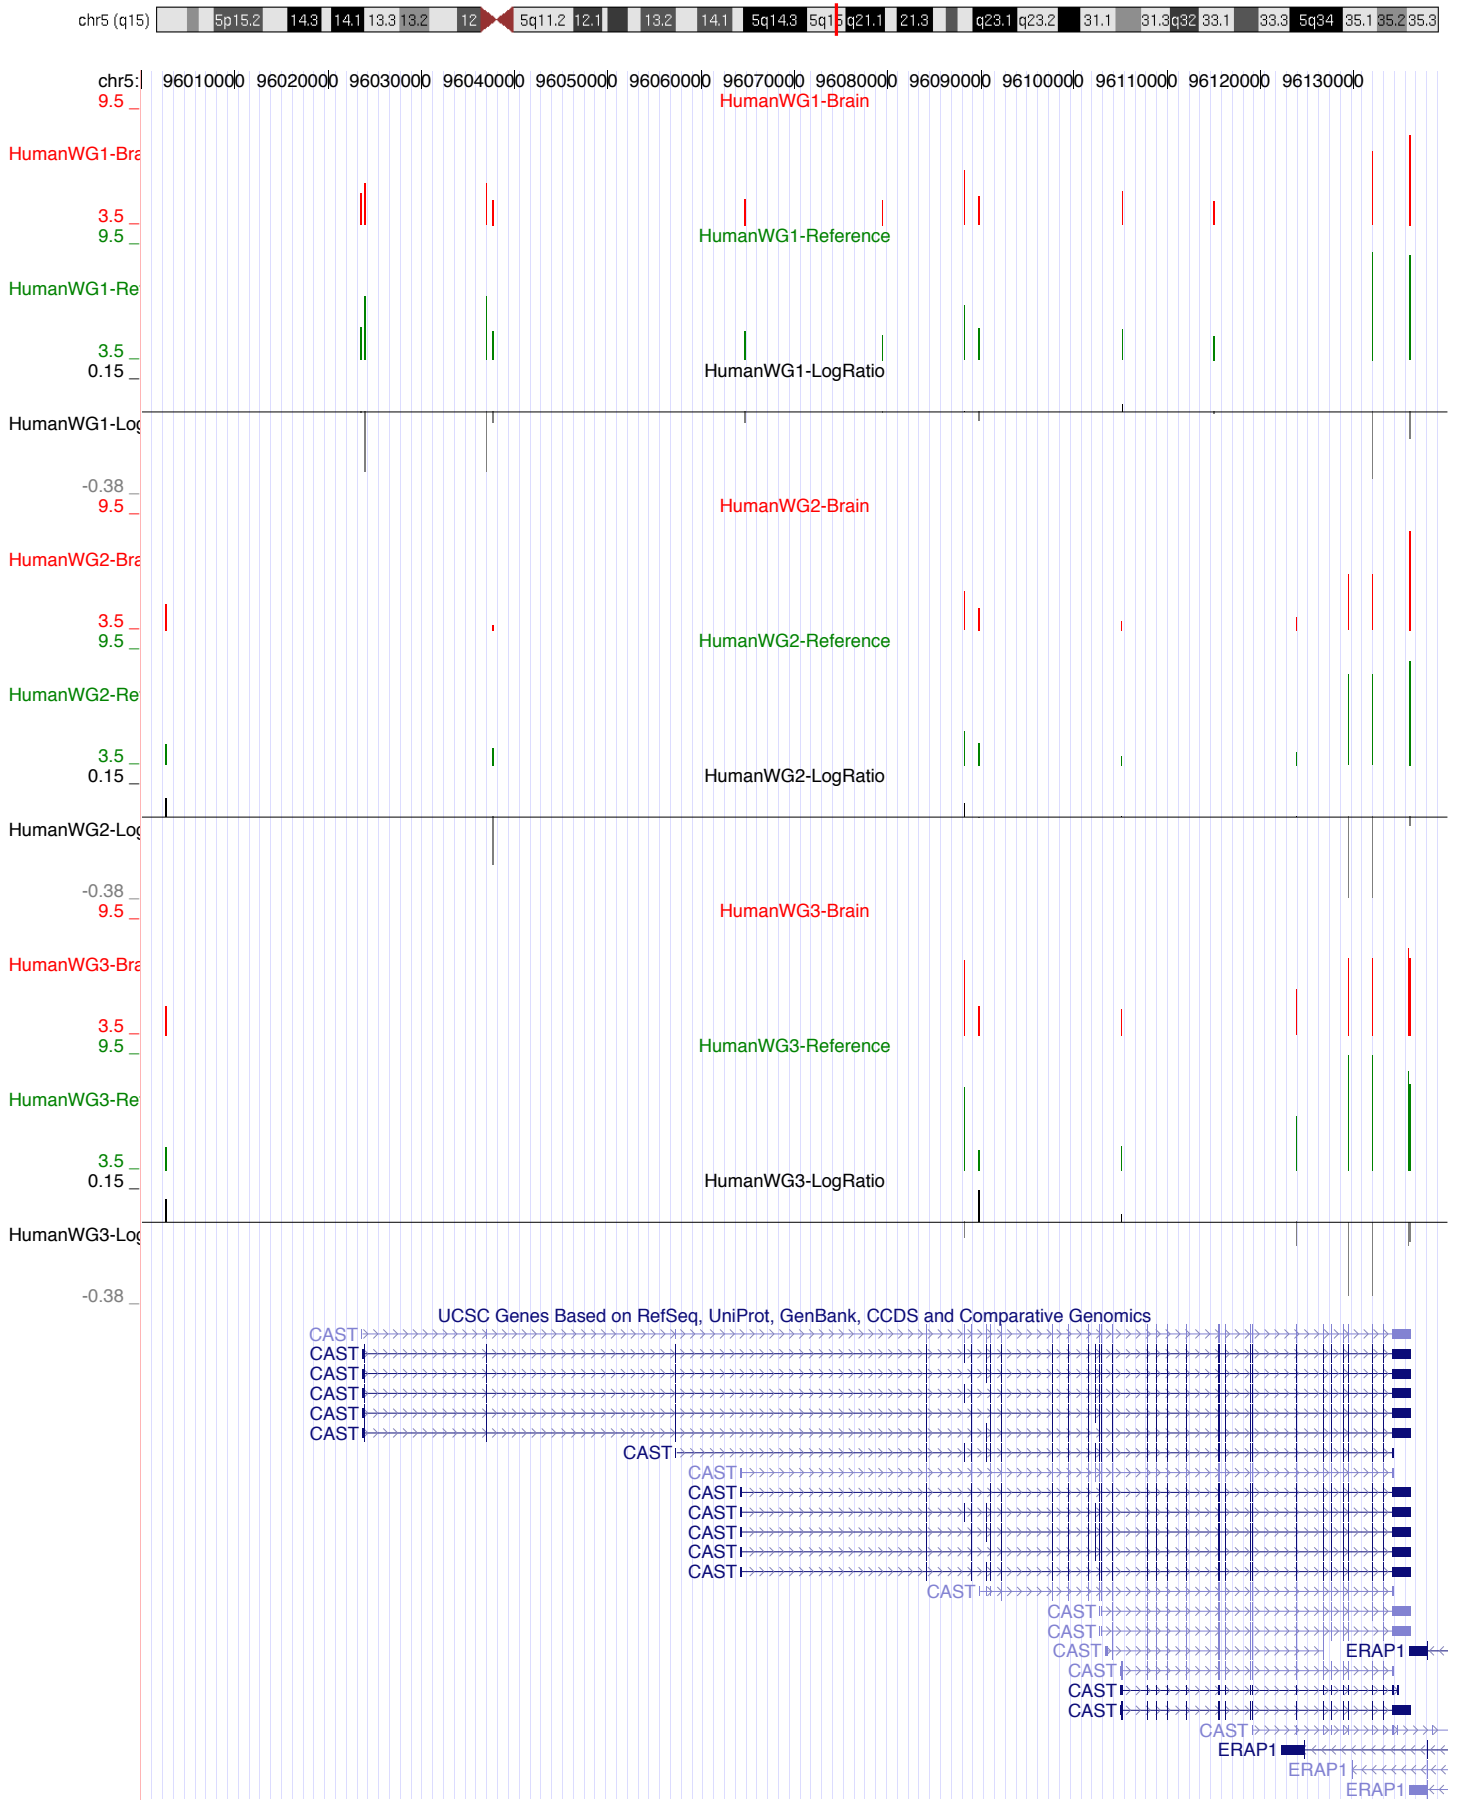

**Figure S8**

## ranking of 16 probes containing splice junctions

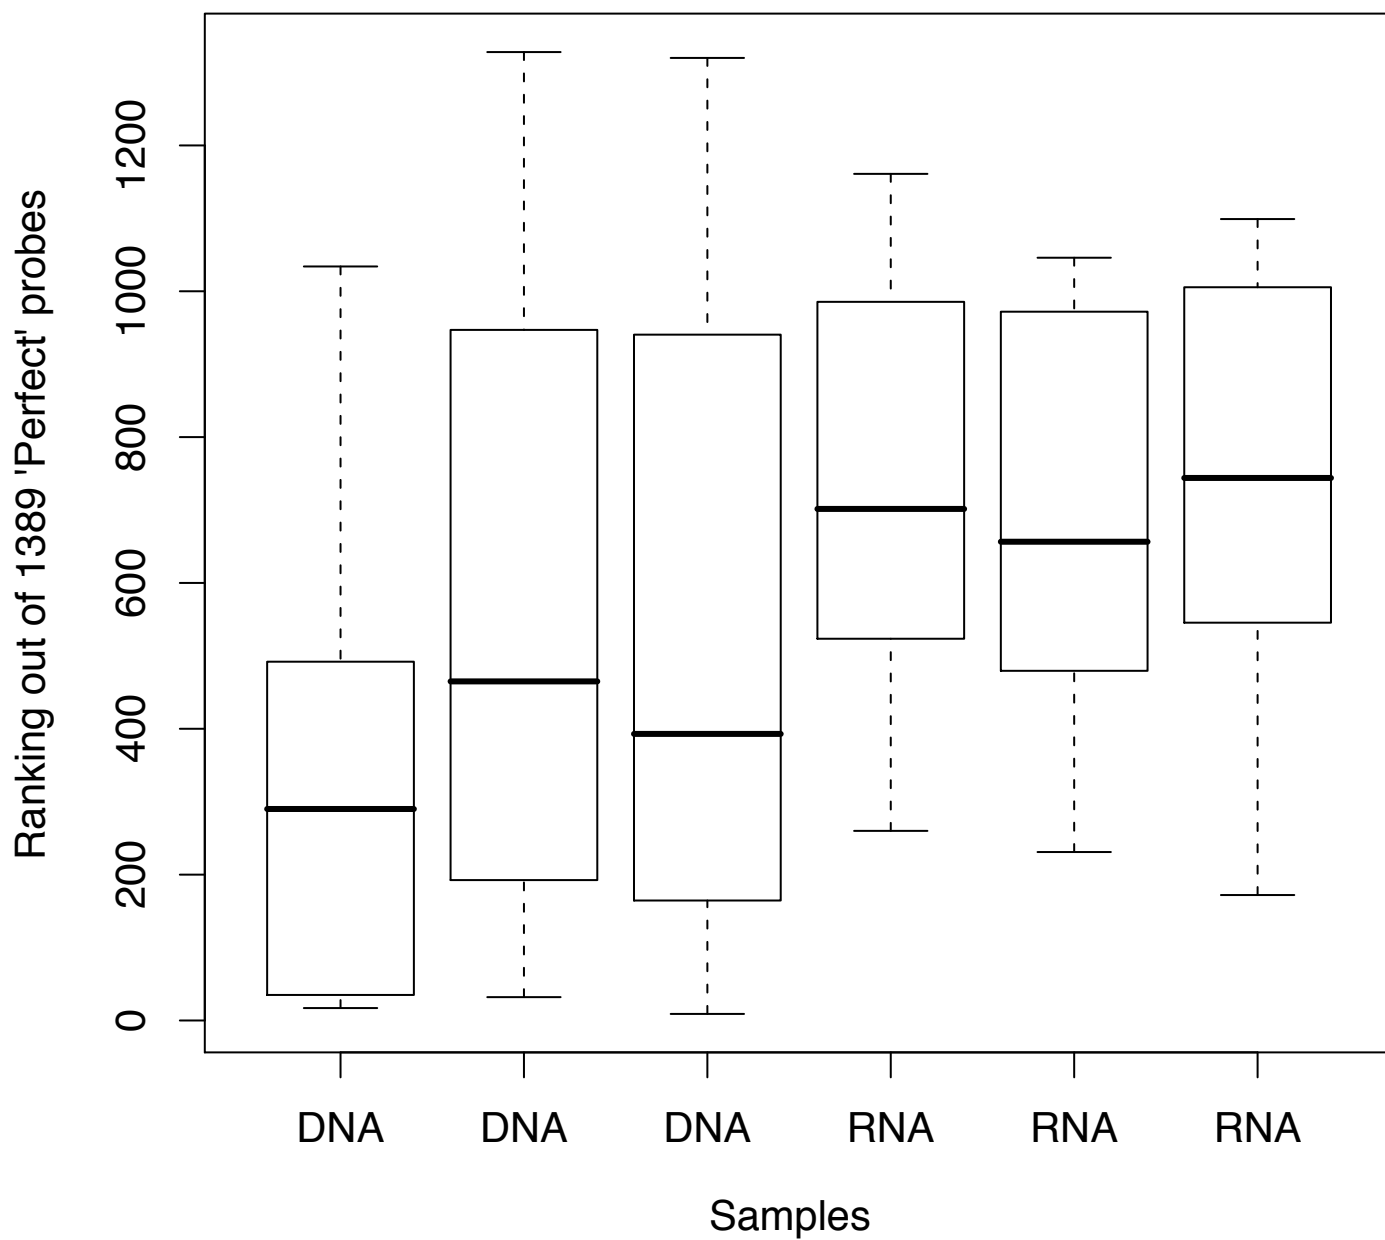

Figure S9

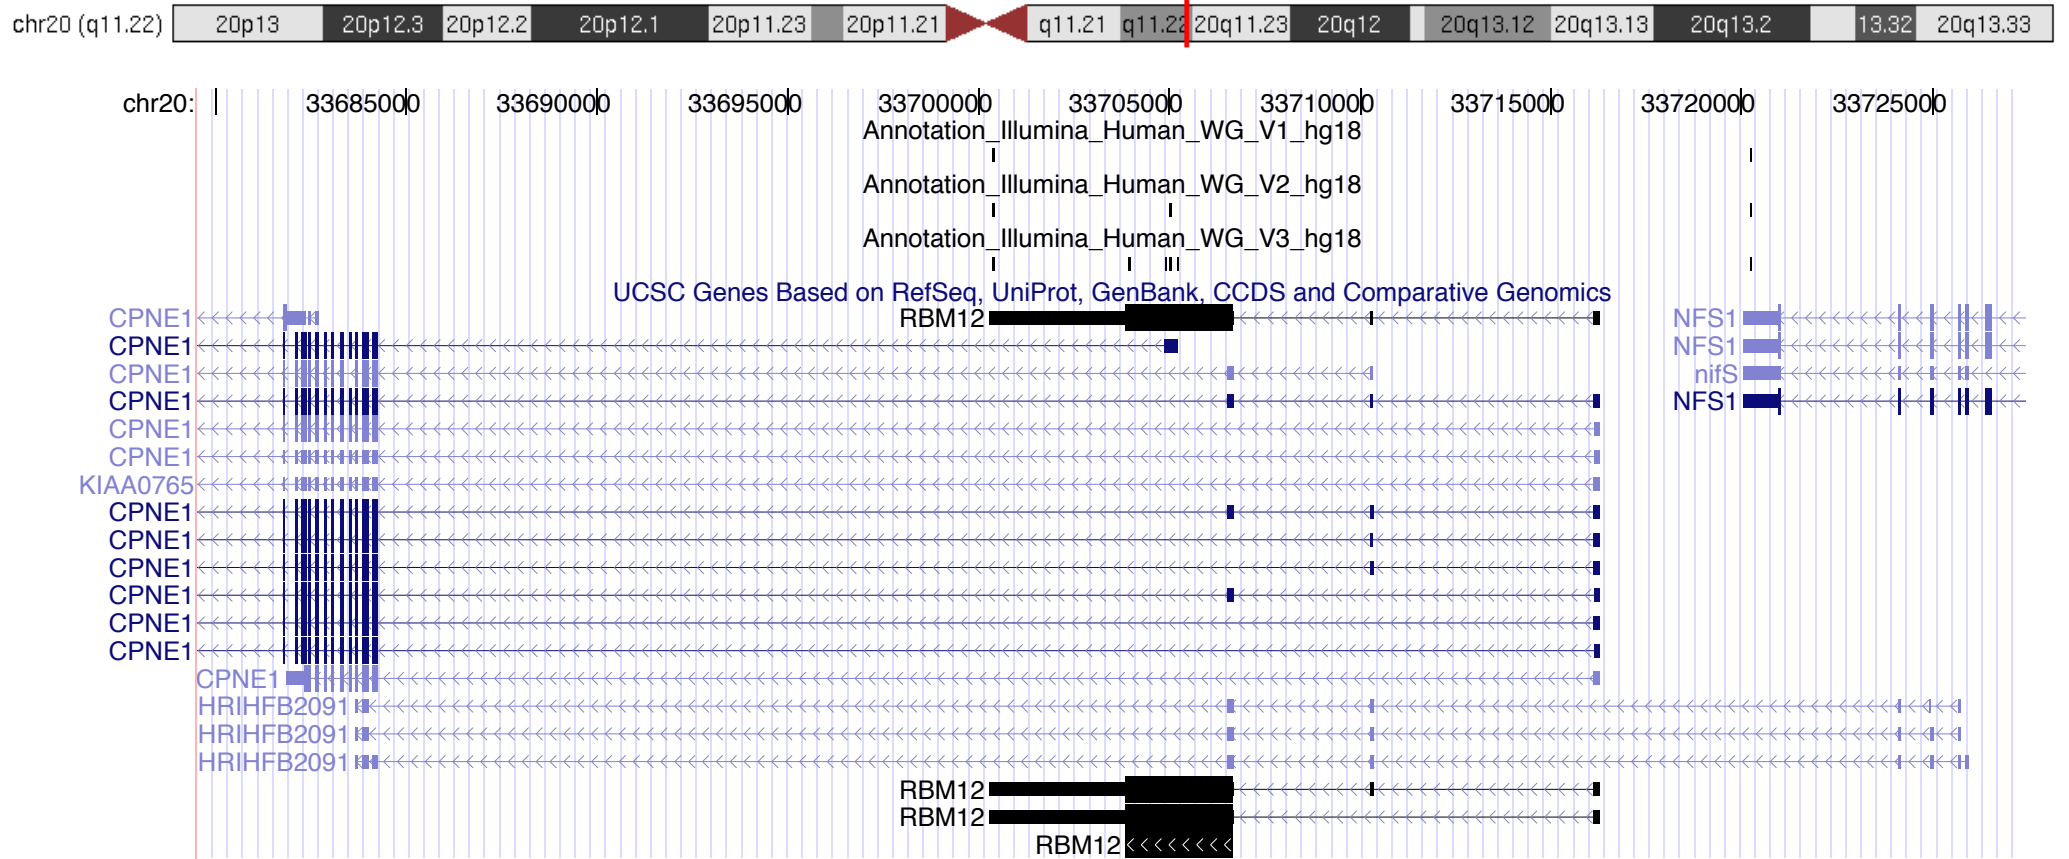

Figure S10
