# Supplementary figures and images for: A re-annotation pipeline for Illumina BeadArrays: improving the interpretation of gene expression data
Source: PubMed Central journal article supplement — Nucleic Acids Res. 2009 Nov 18;38(3):e17. doi: 10.1093/nar/gkp942 (PMC2817484; doi:10.1093/nar/gkp942), 2009-11-18

**A**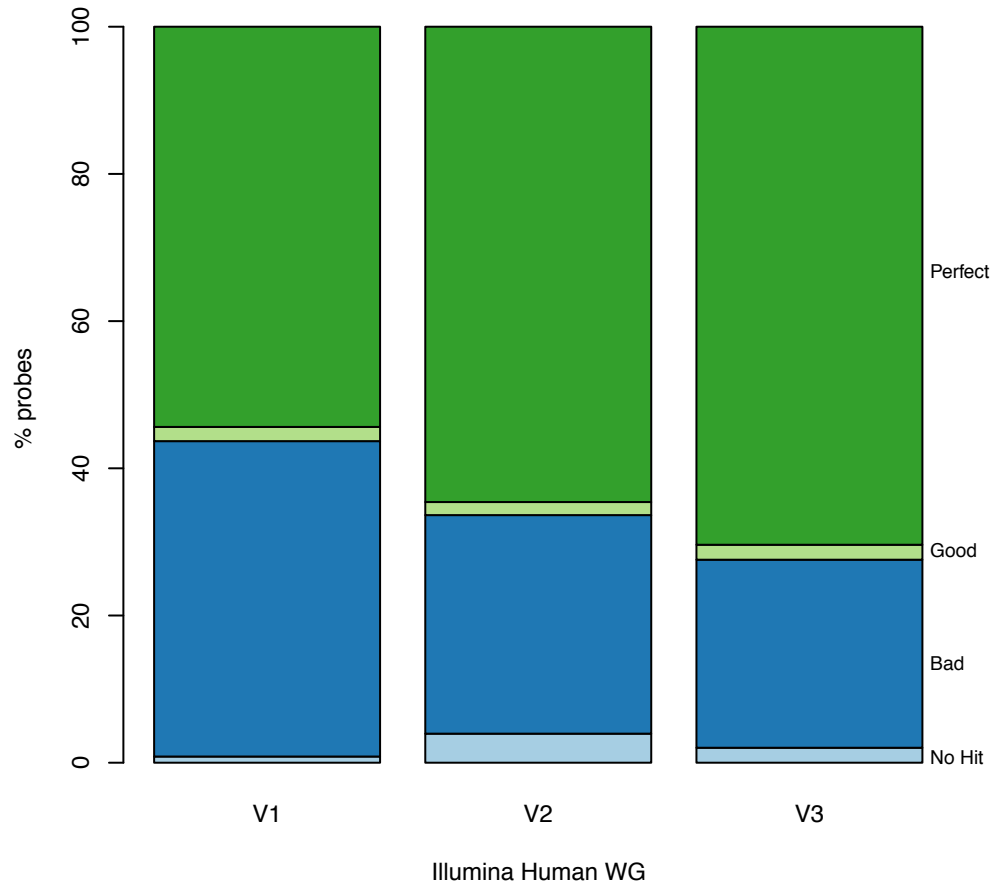**B**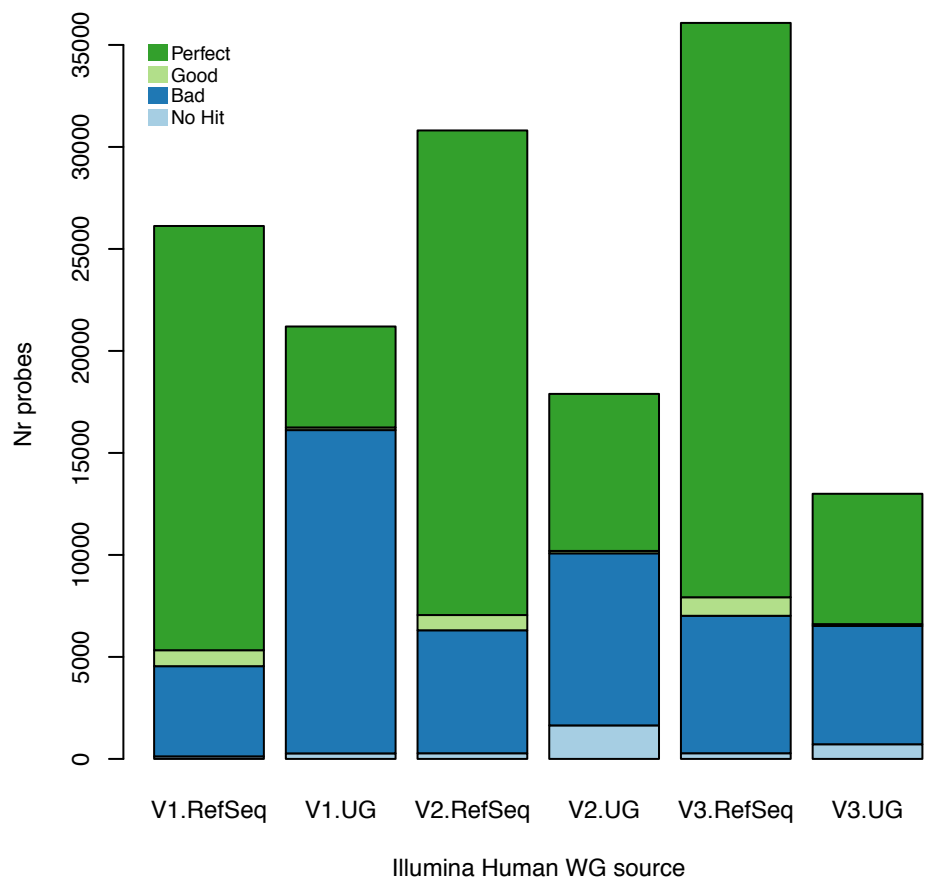**Figure S2**

**A**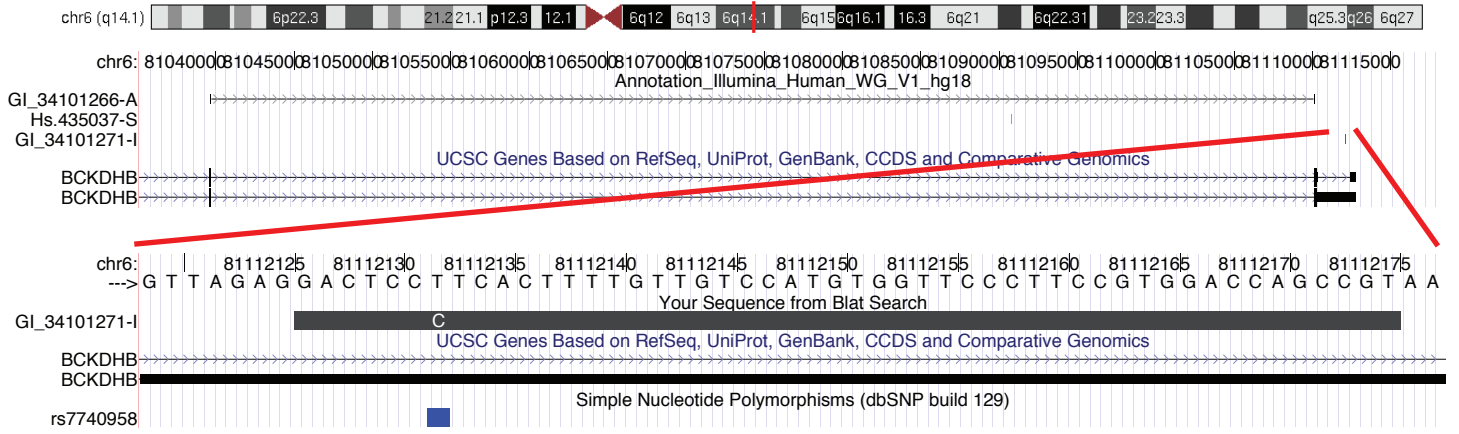**B**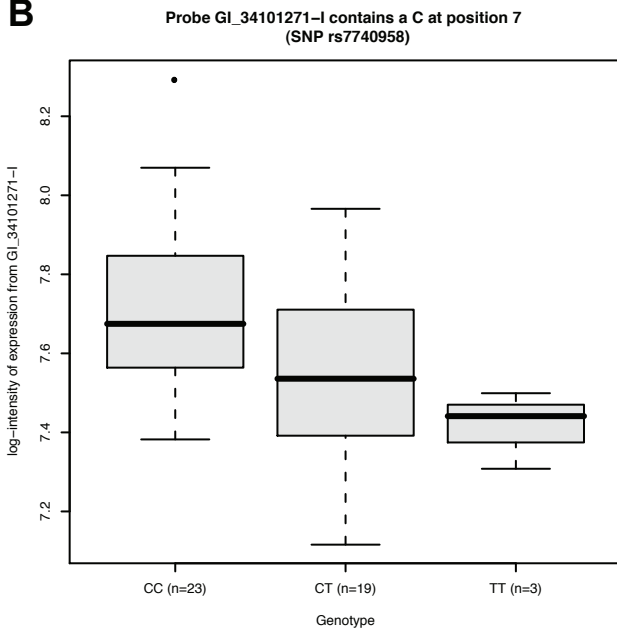**C**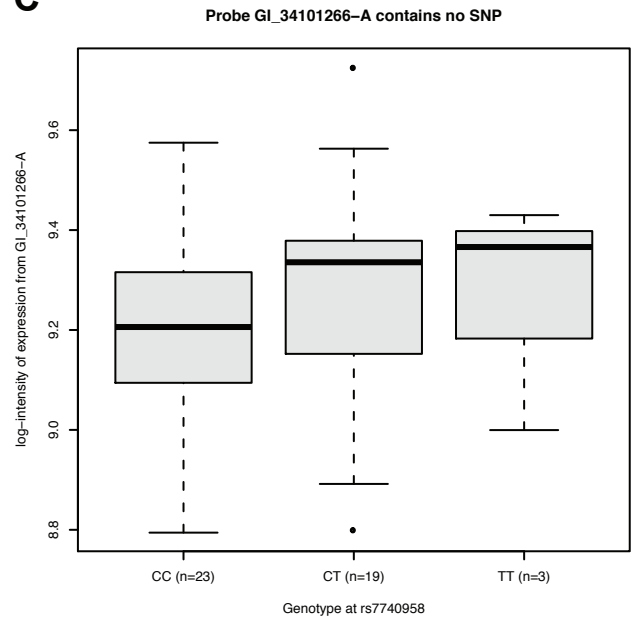**D**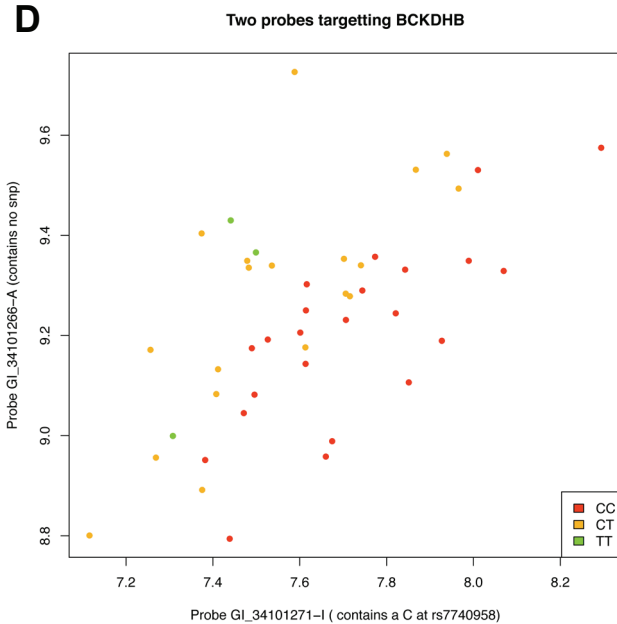**E**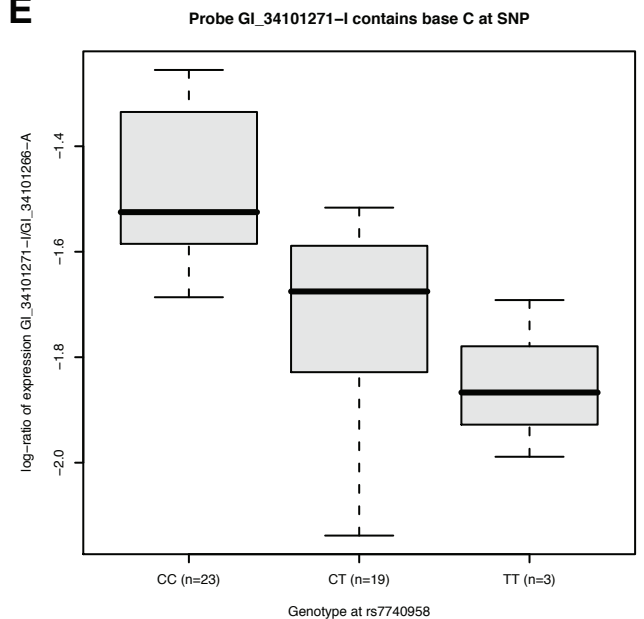**Figure S3**

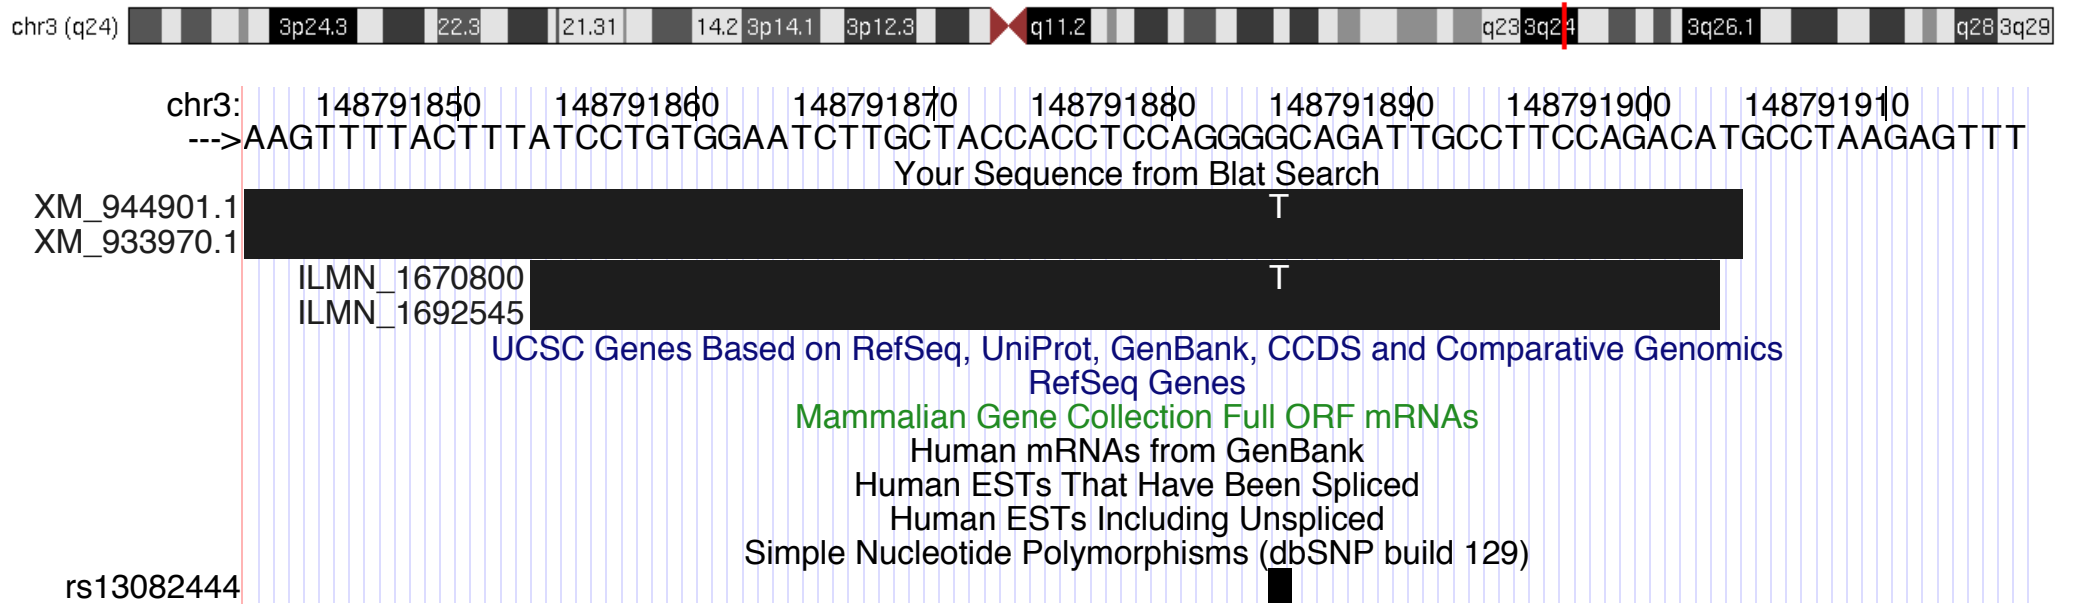

Figure S4

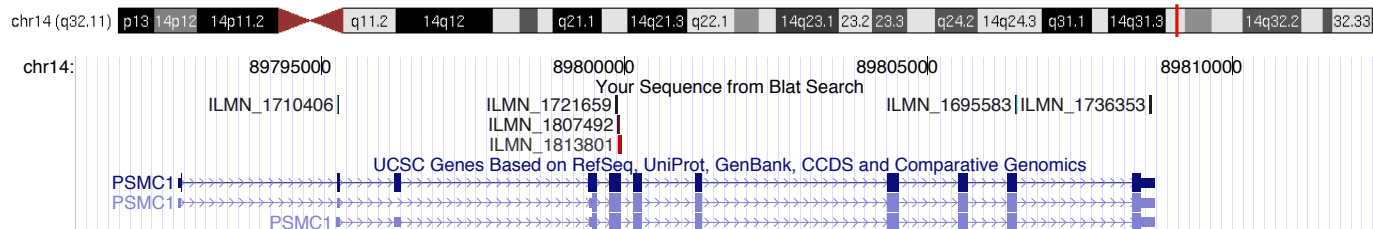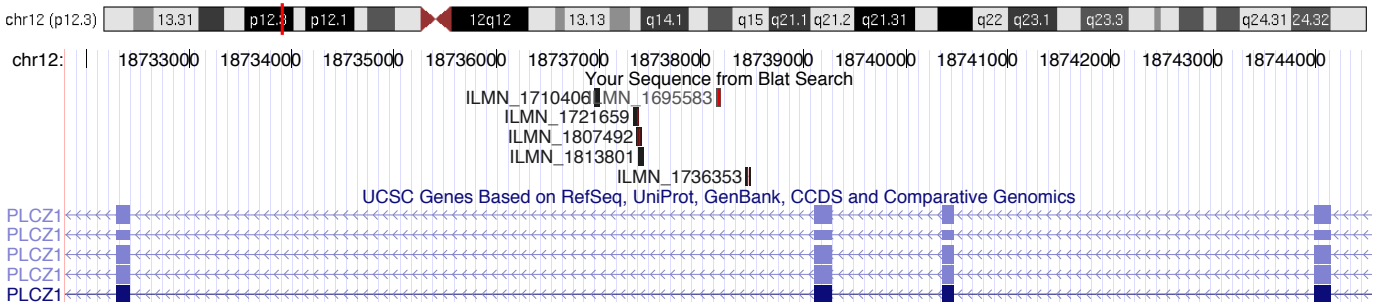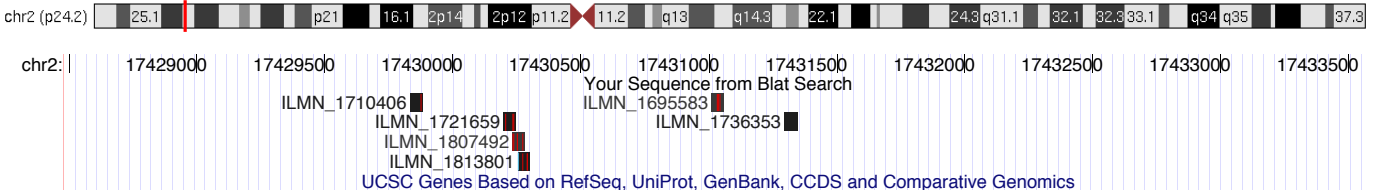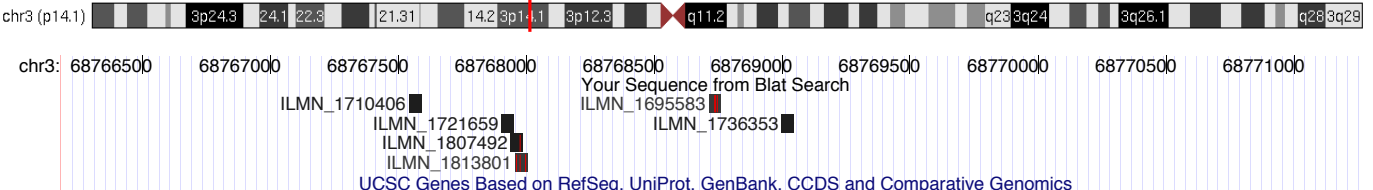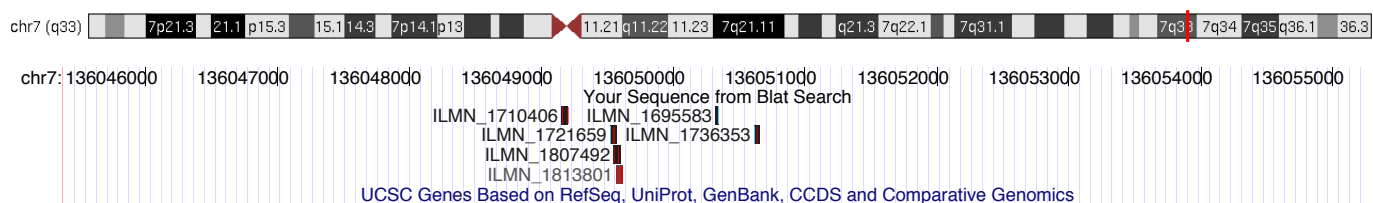

Figure S5

chrX (p11.23)

Xp22.2

21.3

Xp21.1p11.4p11.3

11.22

12 13.1

Xq21.1

q21.31

21.33 22.1

Xq22.3

Xq23

q24

Xq25

26.3

q27.3

Xq28

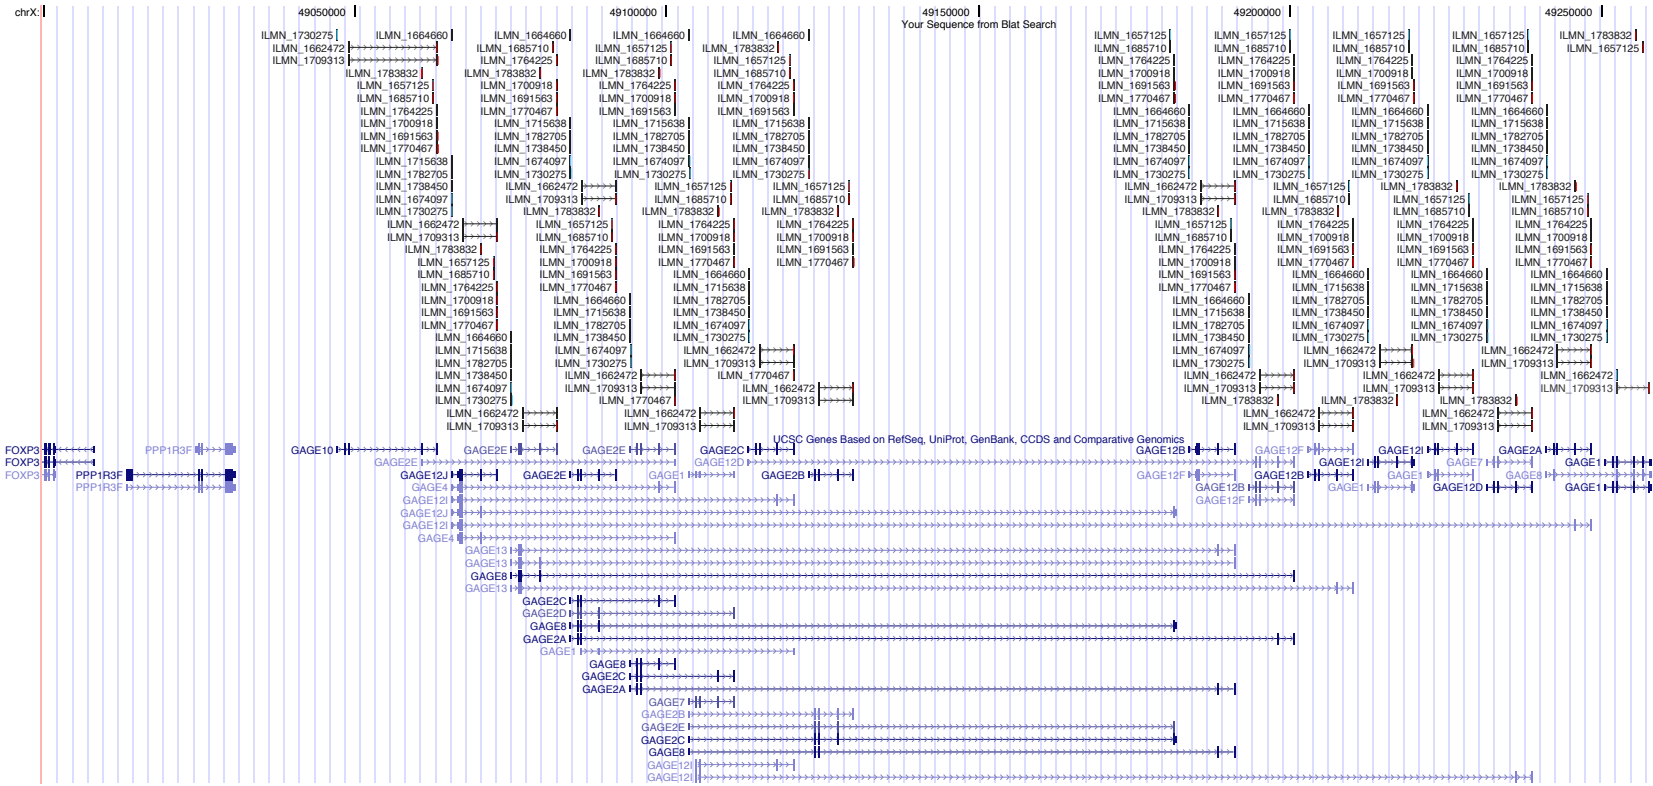

Figure S6

Supplement: gkp942_3.pdf [file gkp942_3.pdf]

chr5 (q31.3) 5p15.2 14.3 14.1 13.3 13.2 12 5q11.2 12.1 13.2 14.1 5q14.3 5q15q21.1 21.3 q23.1 q23.2 31.1 31.3q32 33.1 33.3 5q34 35.1 35.2 35.3

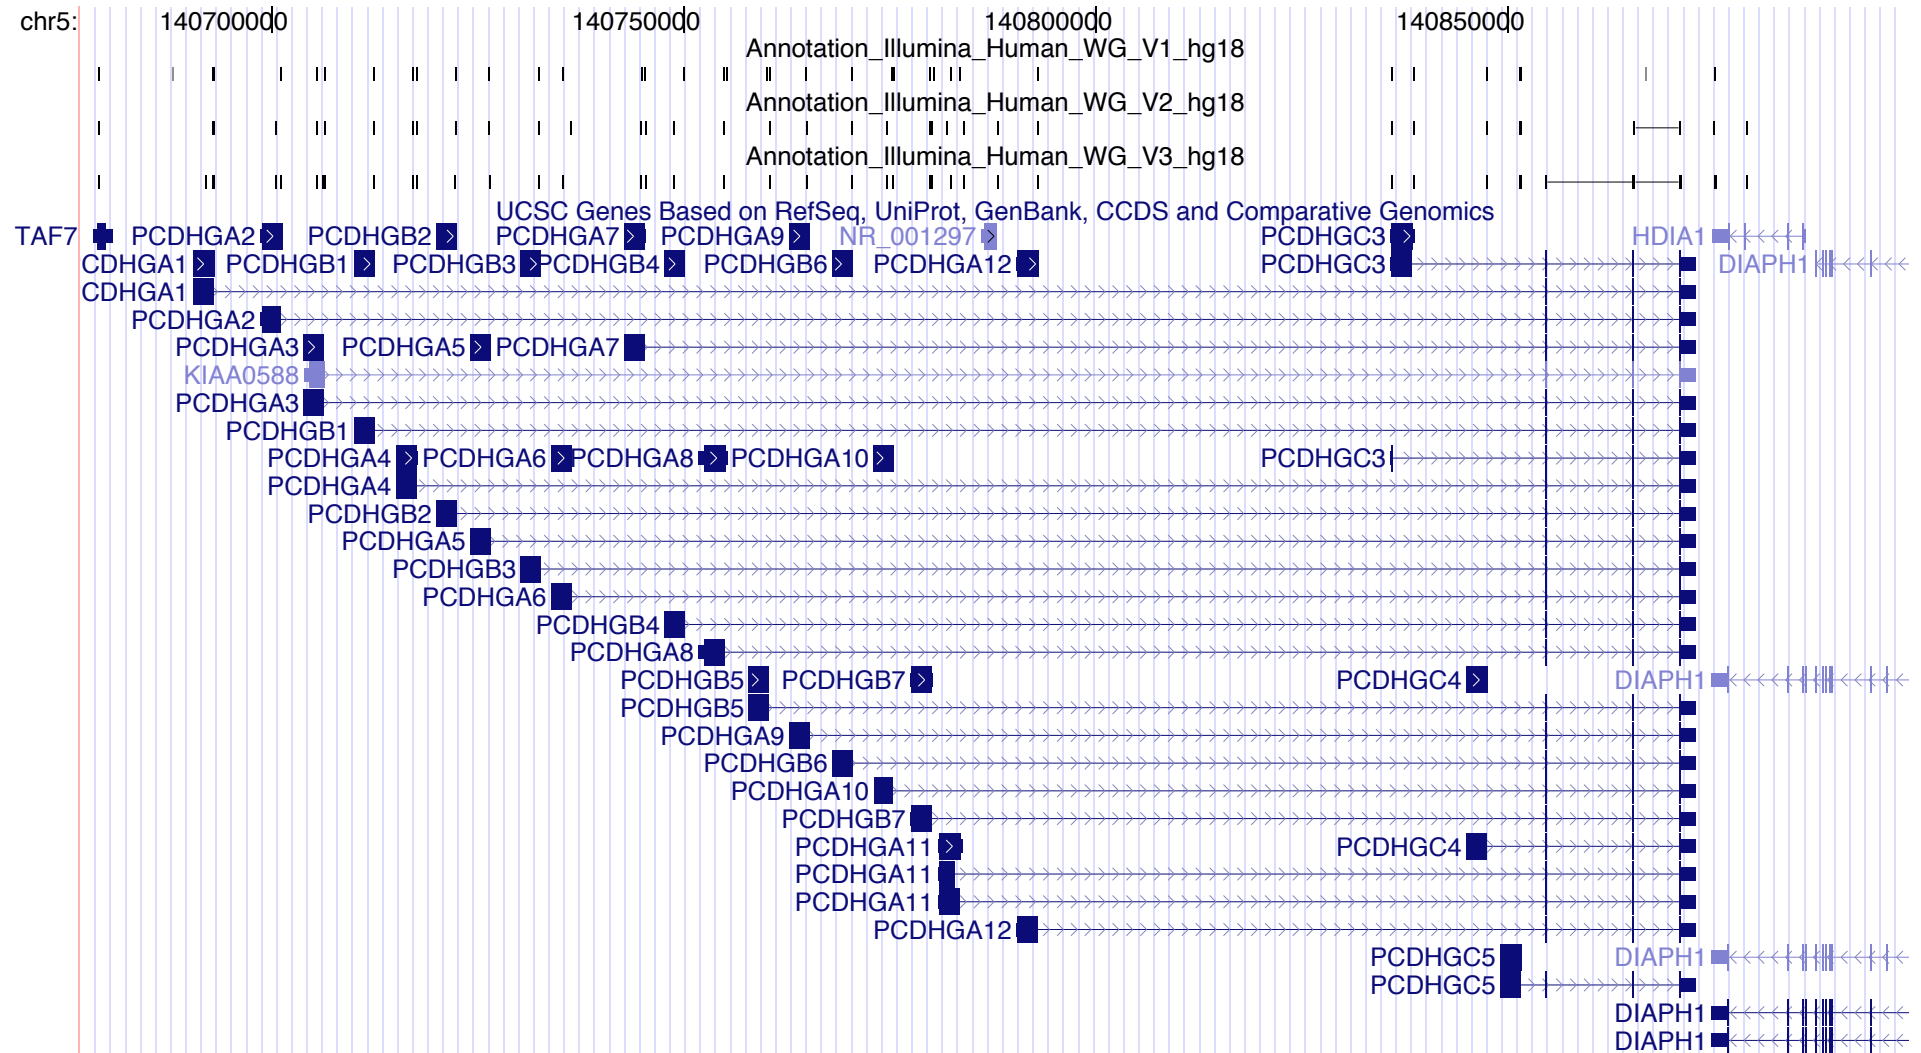

Figure S11

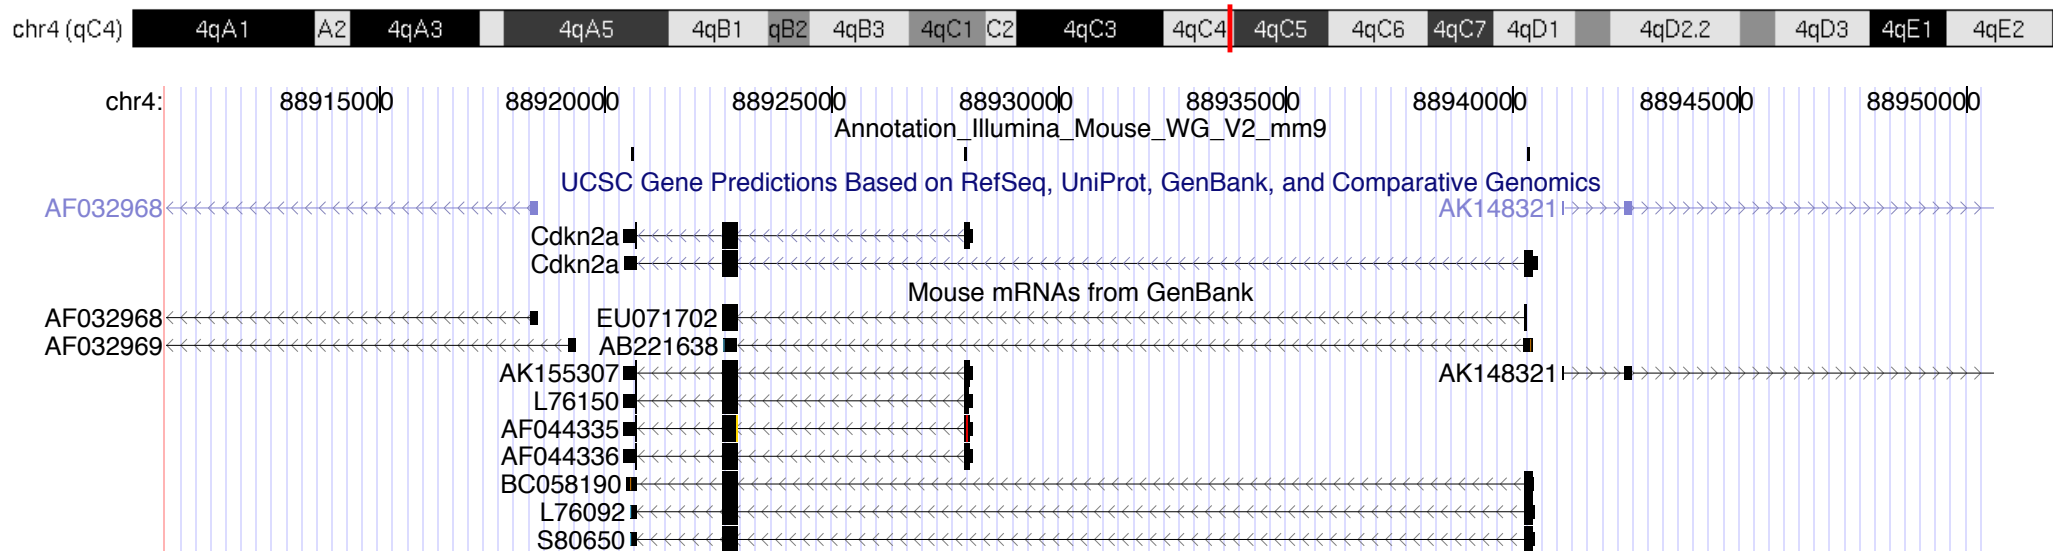

Figure S12



**A**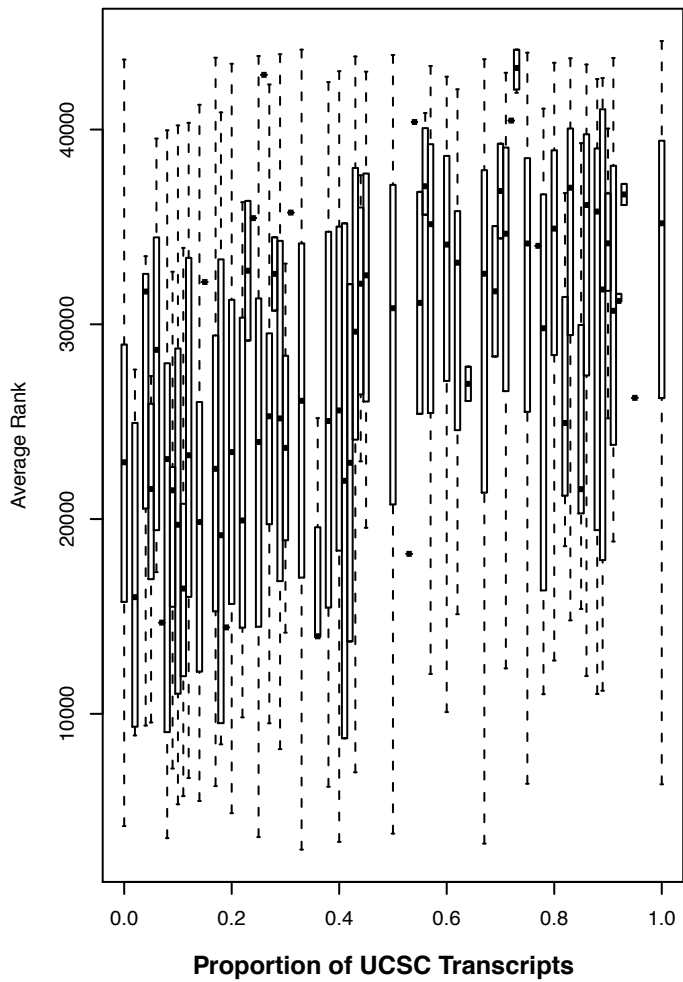**B**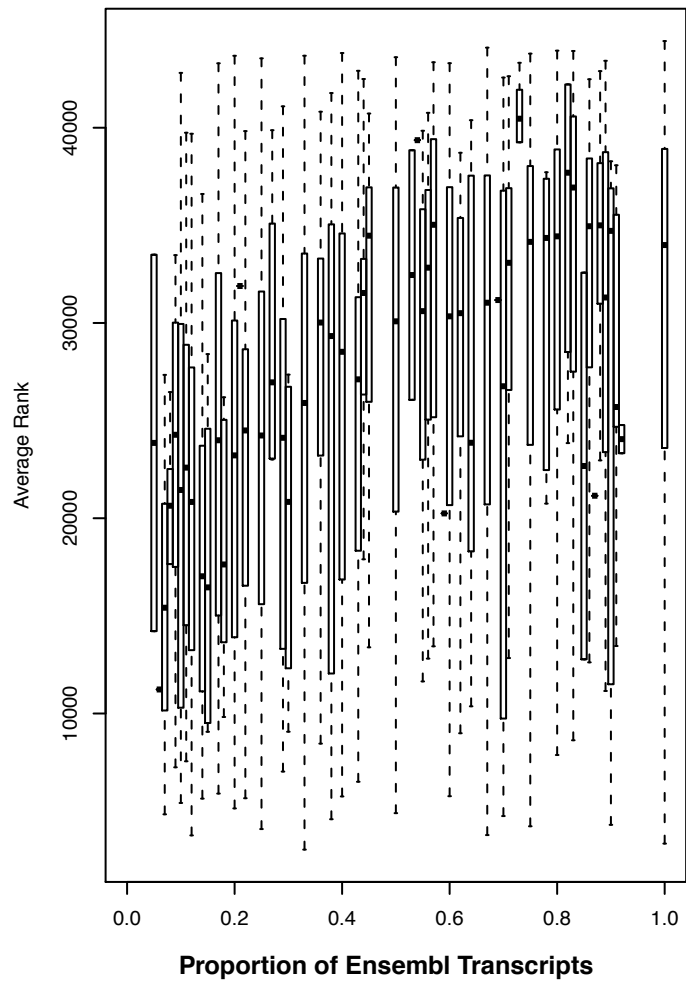**C**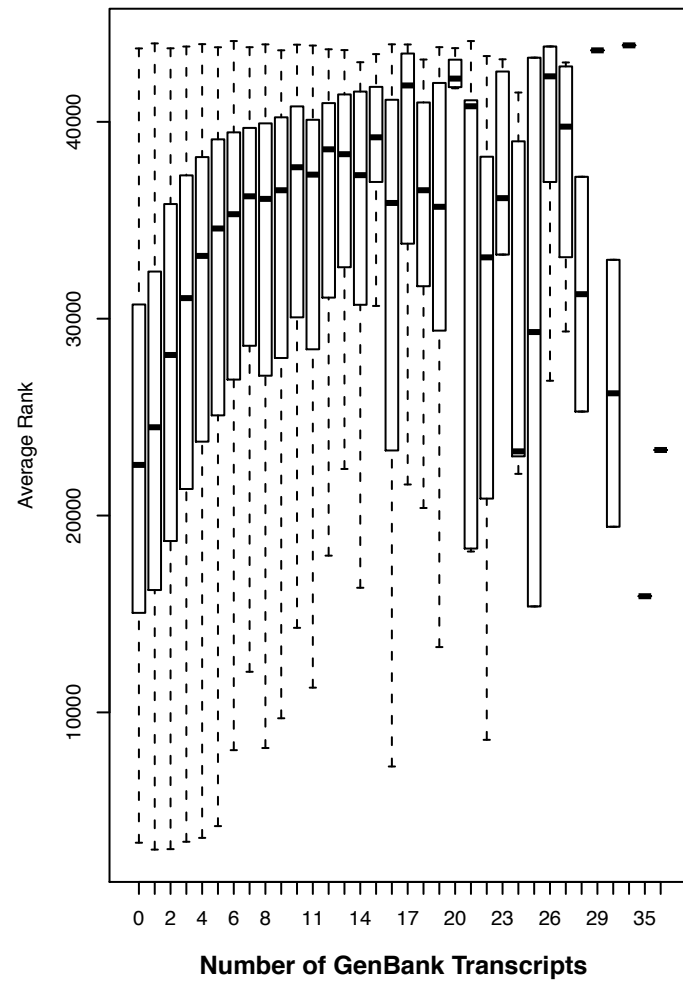**Figure S14**

Supplement: gkp942_5.pdf [file gkp942_5.pdf]

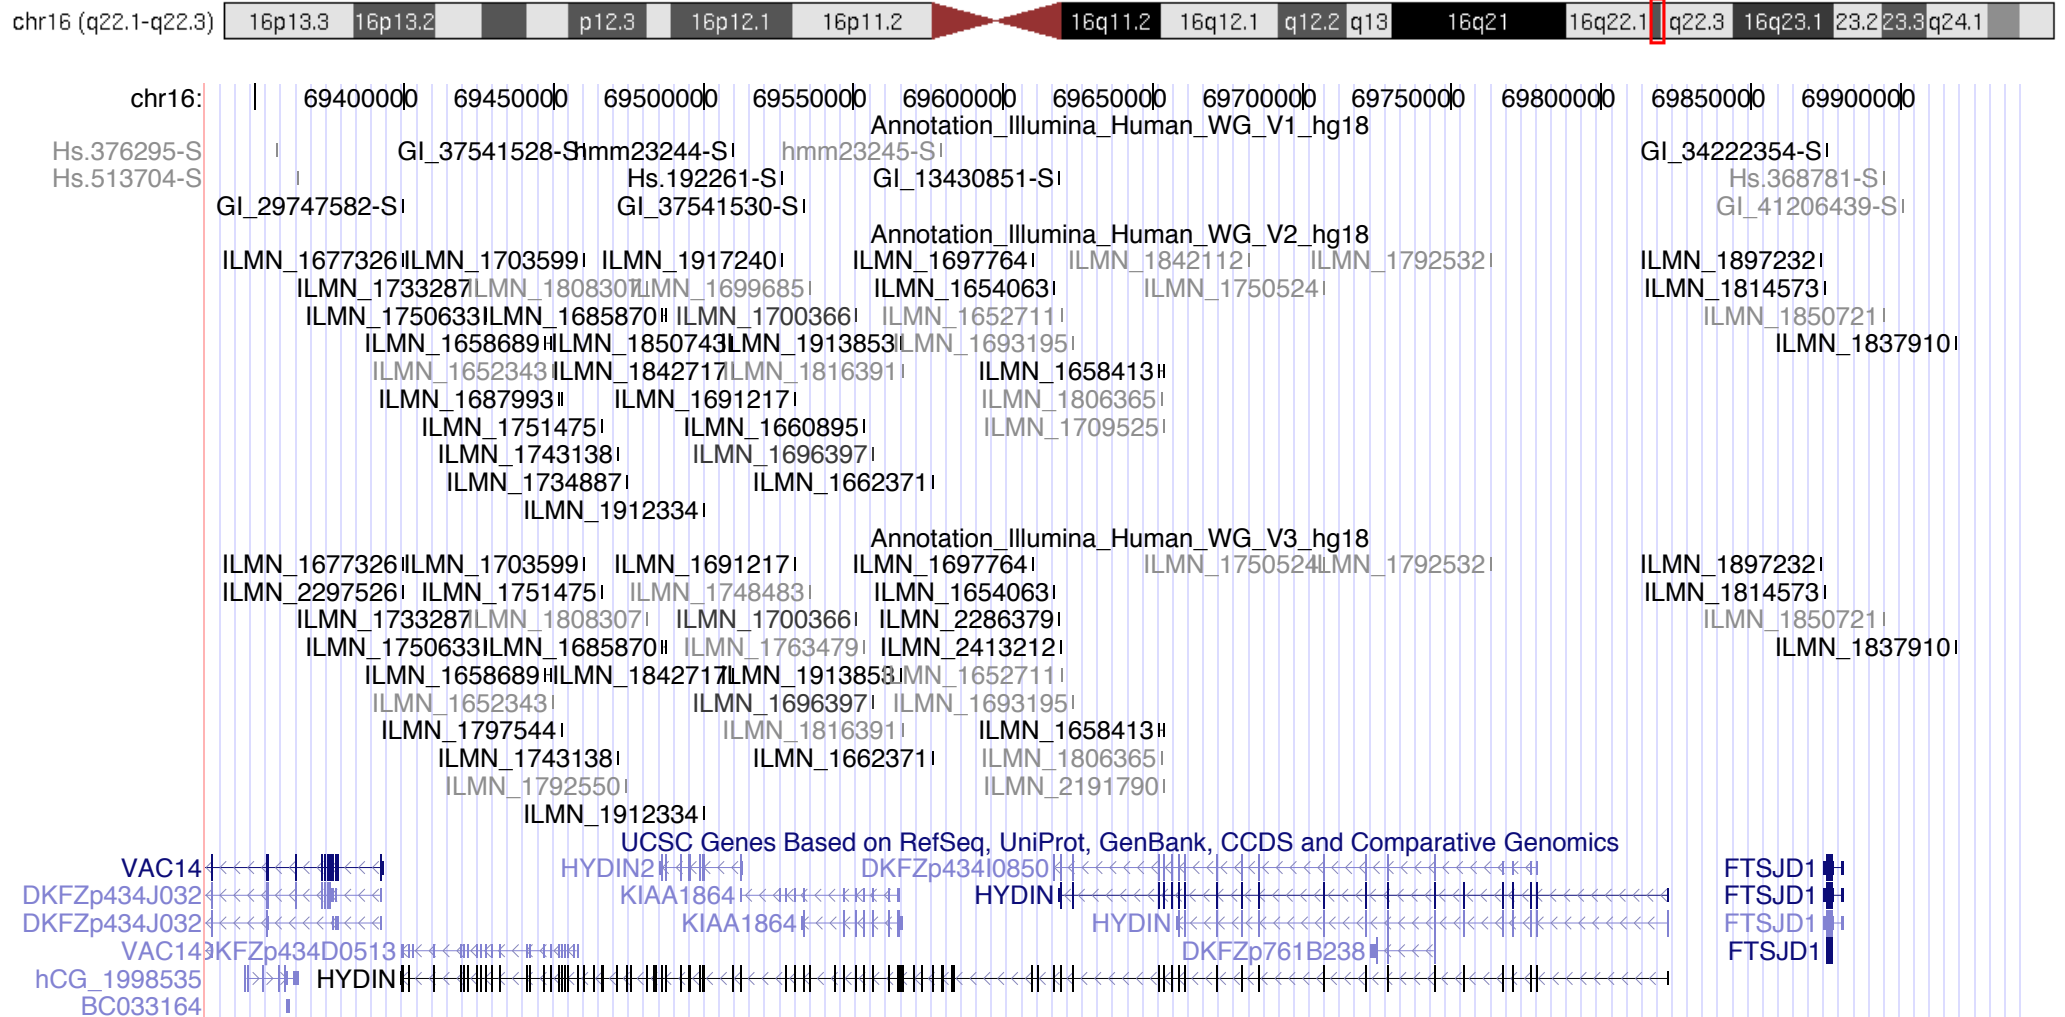

Figure S16



**A**

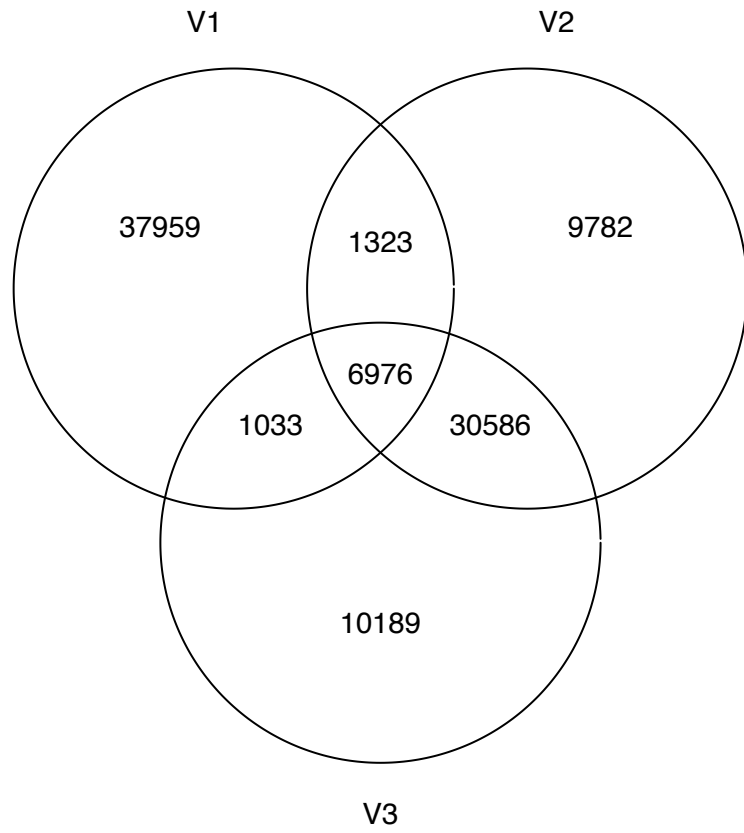

**Human WG-6 Probes**

**B**

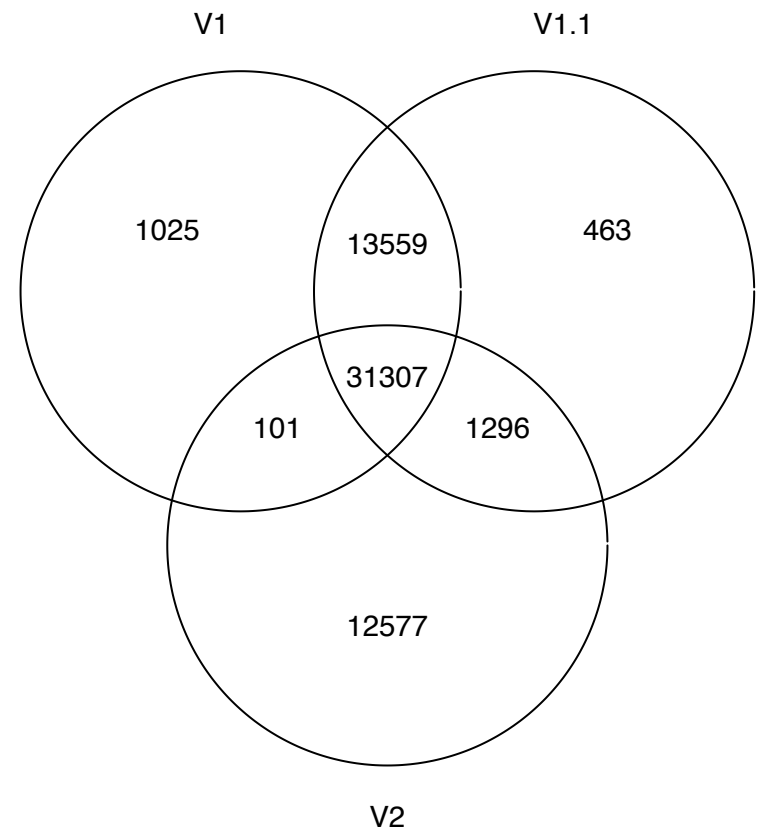

**Mouse WG-6 Probes**

**Figure S18**

Supplement: gkp942_6.pdf [file gkp942_6.pdf]

**A****Transcriptomic hits**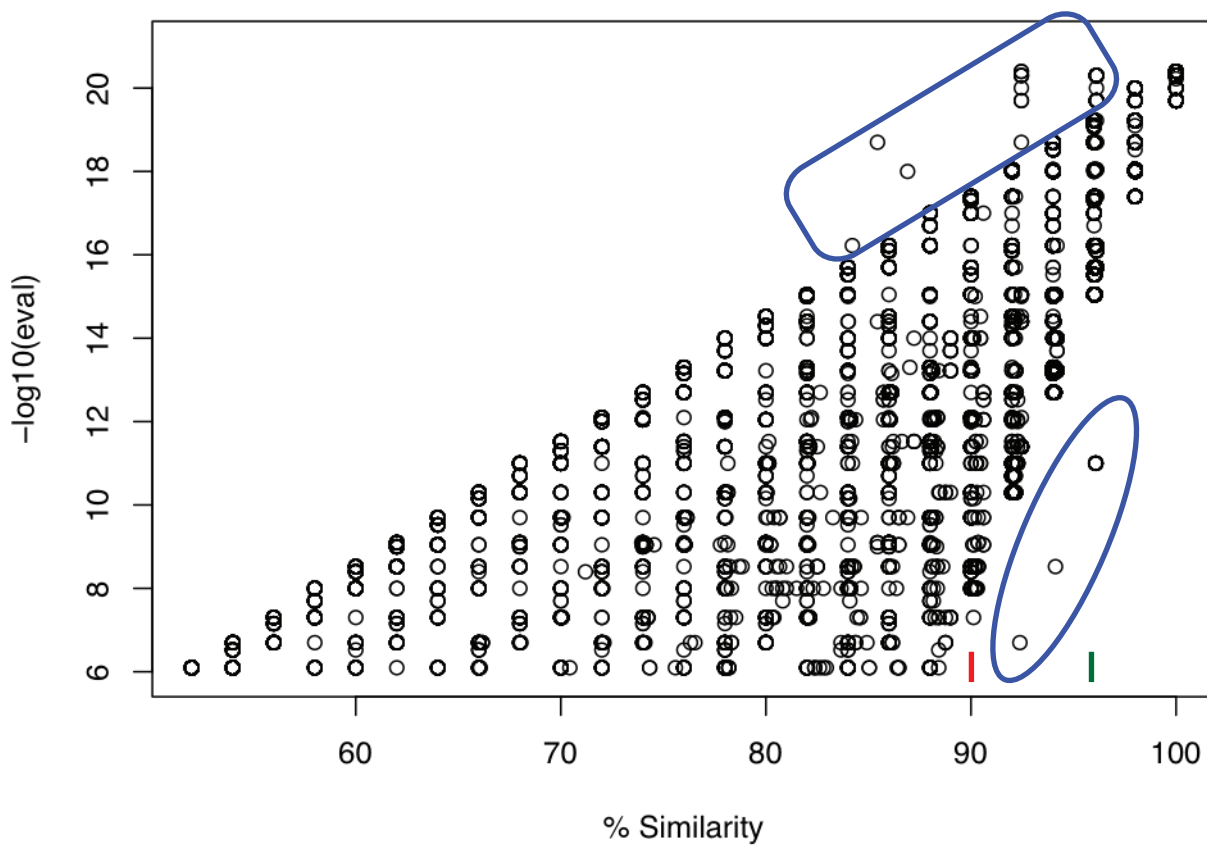**B****Genomic hits**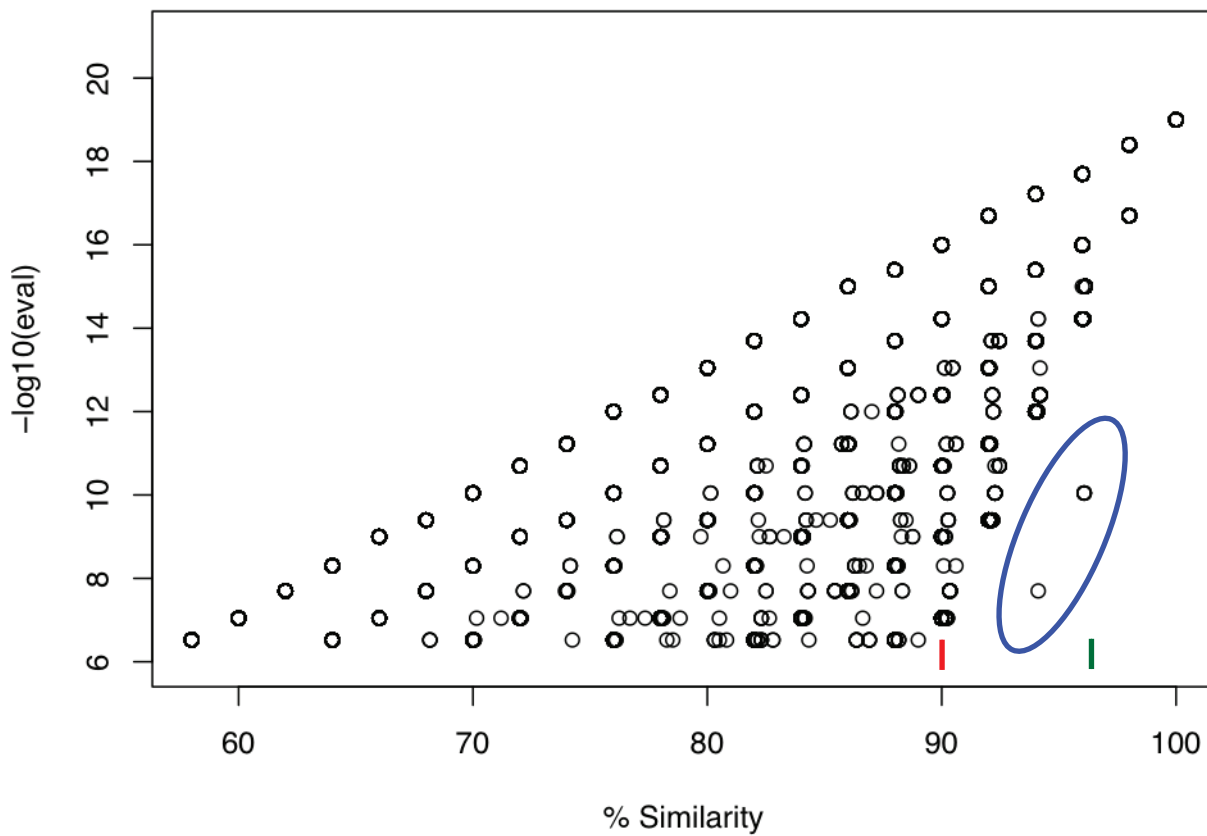**Figure S19**

Supplement: gkp942_7.pdf [file gkp942_7.pdf]
